# Supplementary material
Source: publisher figshare collection journal article supplement (https://rs.figshare.com/ndownloader/files/12467948)
Supplement: Supplementary file 1 [file 12467948]

**Electronic Supplemental Material**

**Using a robotic fish to investigate individual differences in social responsiveness in the guppy (S2)**

David Bierbach1*, Tim Landgraf2*, Pawel Romanczuk3,4, Juliane Lukas1,3, Hai Nguyen1, Max Wolf1, Jens Krause1,3

*1 Leibniz-Institute of Freshwater Ecology & Inland Fisheries*

*Müggelseedamm 310, 12587 Berlin, Germany*

*2 Freie Universität Berlin, Institute for Computer Science, Dept. Of Mathematics and Computer Science*

*Arnimallee 7, 14195 Berlin, Germany*

*3 Humboldt University of Berlin, Faculty of Life Sciences, Thaer Institute, Hinter d. Reinhardtstr. 8-18, Berlin, Germany*

*4 Institute for Theoretical Biology, Department of Biology, Humboldt Universität zu Berlin, Philippstr 13, 10115 Berlin*

** Authors contributed equally*

**Calculation of average time-delayed cross-correlation (TLXC)**

We calculated the time-delayed normalized cross correlation function for different values of the lagtime *τ*: *C(τ)=< v(t)vf(t+τ)>t* with *vf* being the velocity of the focal individual and *<...>t* indicating a time average over all points where *v(t)vf(t+τ)* is defined. As the cross correlation, requires the shifting of the velocity vector of the focal individual by *k* points, with *τ=kΔt* (*Δt:* time difference between two time frames), the time average for different *τ* (different *k*) has to be taken over *kavg=* points where *v(t)vf(t+τ)* is defined. Here *T* is the total trajectory duration used in experiments *T=120s.* For example for *τ =3s*  and *Δt=0.111,* we obtain *kavg=* 1053. Eventually, we calculated **TLXC** as the average *C(τ)* over a finite range of timelags (*τ =*0 - 6s): **TLXC***=< C(τ) >*.
